# Supplementary material for: Effective population size does not predict codon usage bias in mammals
Source: PubMed Central journal article supplement (PMC4242573; doi:10.1002/ece3.1249), 2014-09-23

# P values estimated from GLS

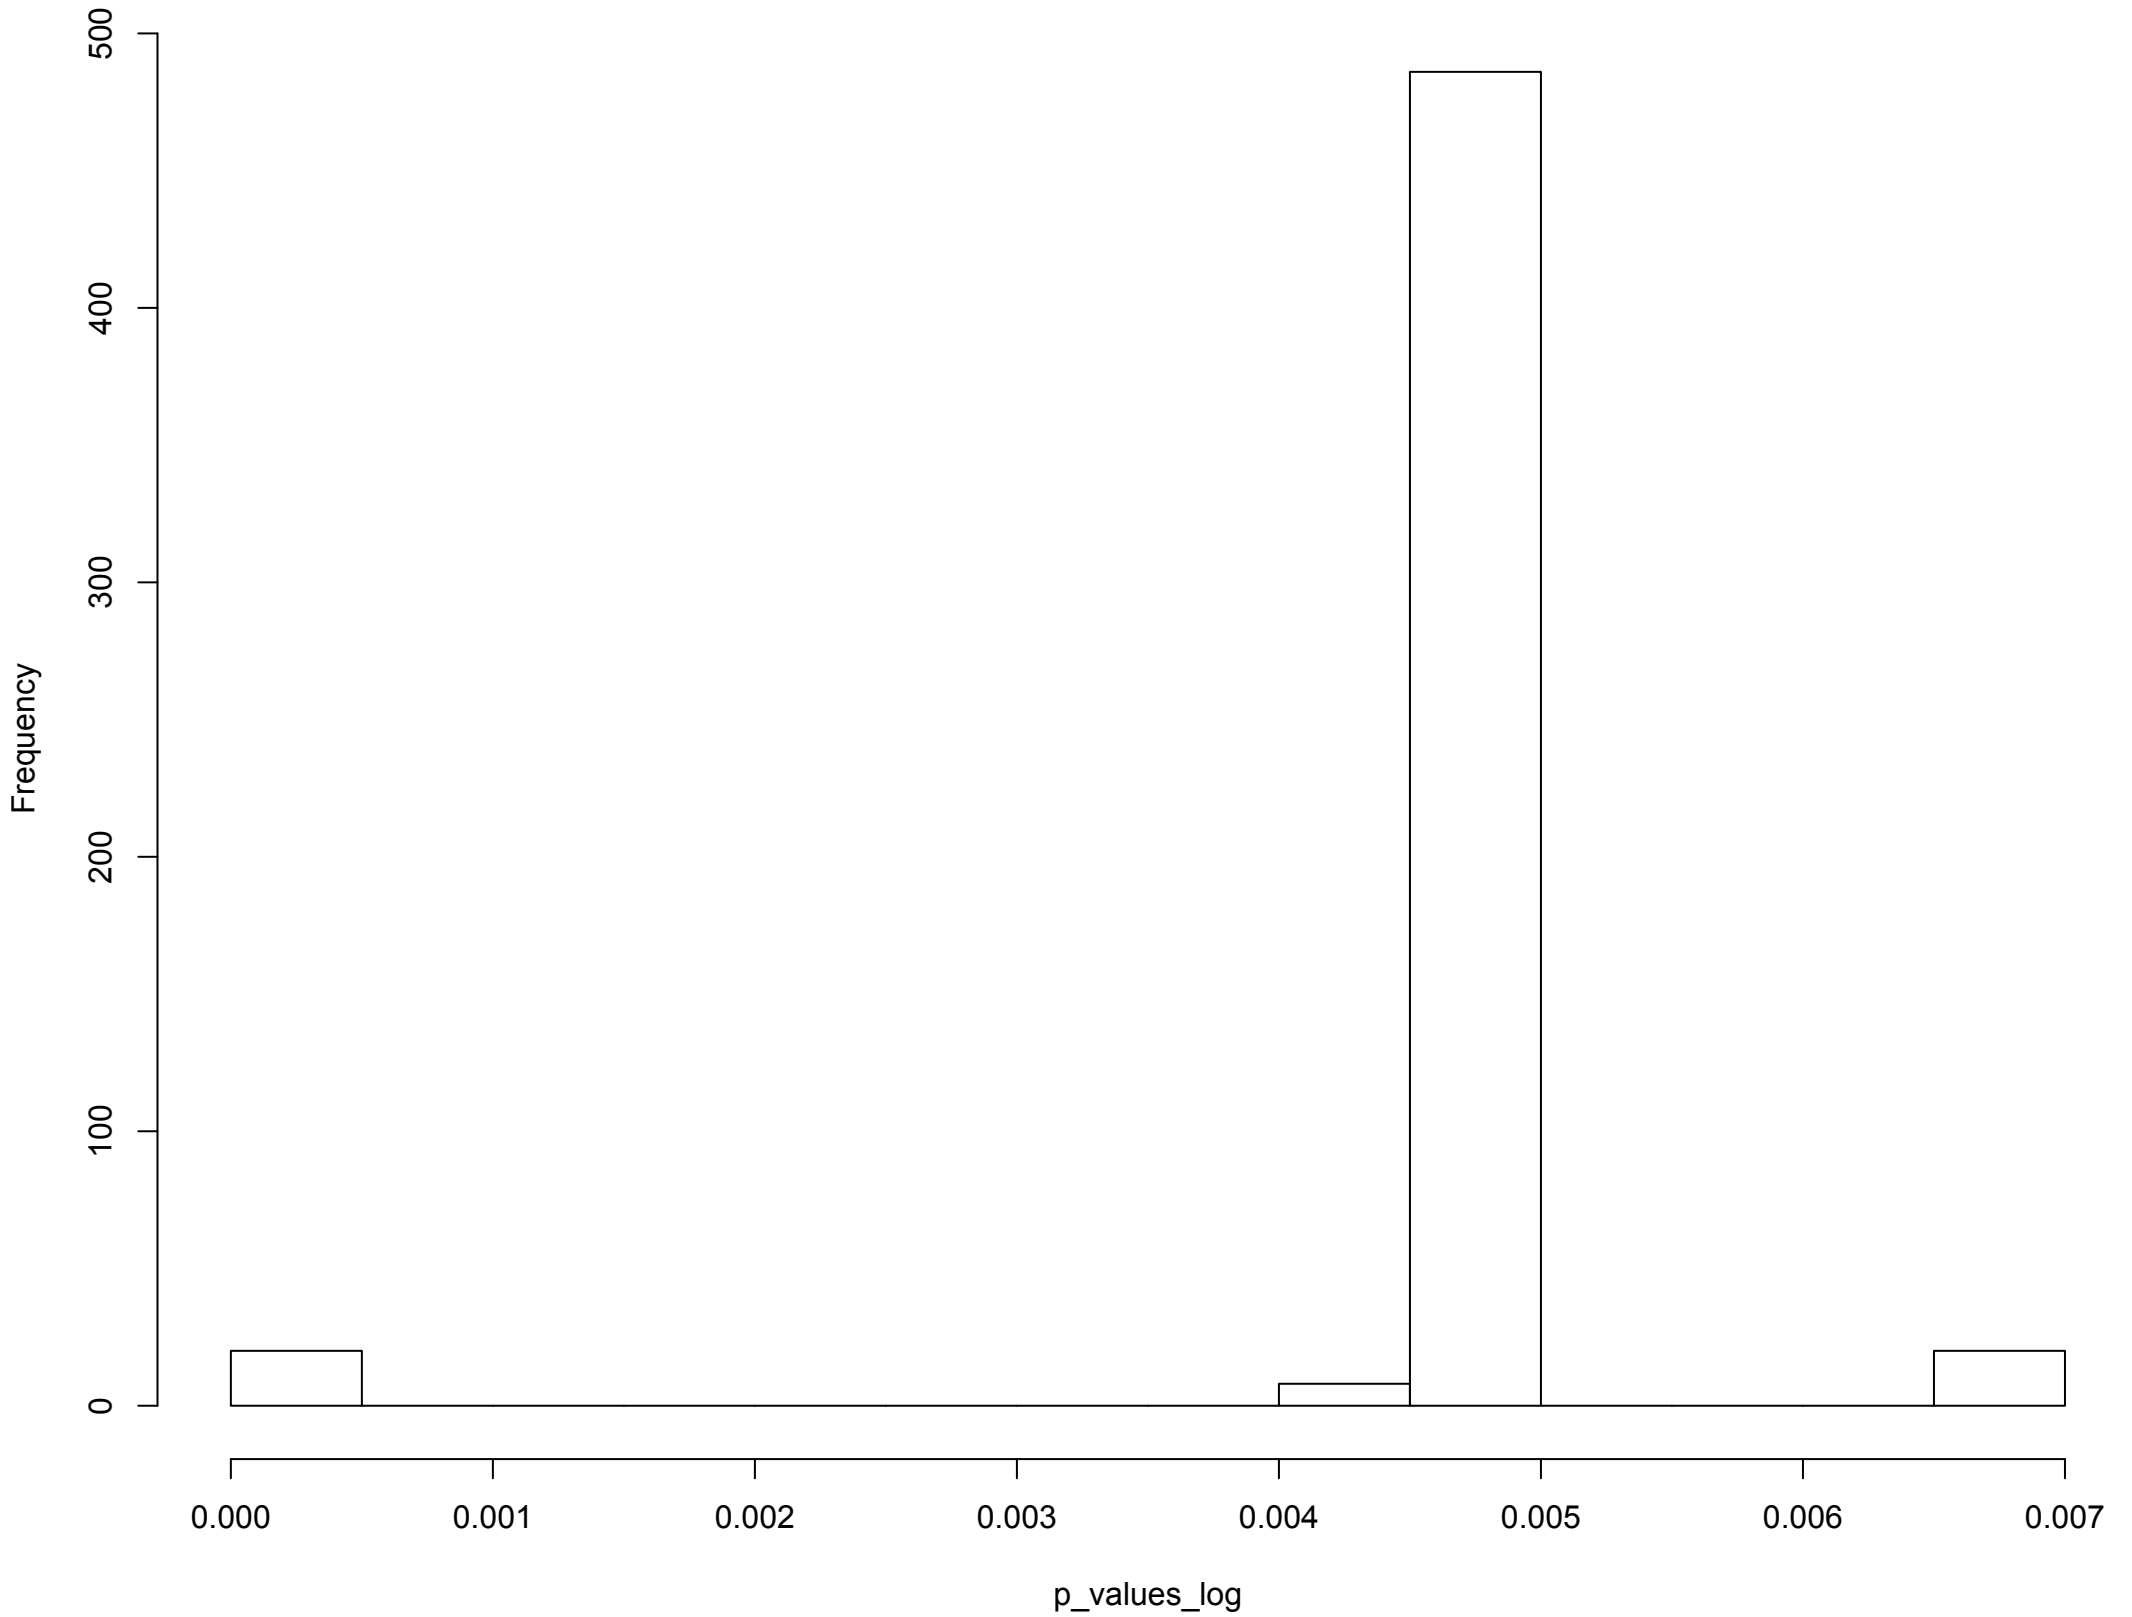

Supplement: ece30004-3887-SD4.pdf [file ece30004-3887-SD4.pdf]
