# Supplementary material for: Effective population size does not predict codon usage bias in mammals
Source: PubMed Central journal article supplement (PMC4242573; doi:10.1002/ece3.1249), 2014-09-23
Supplement: ece30004-3887-SD5.pdf [file ece30004-3887-SD5.pdf]

**Appendix S5. The results of a phylogenetic generalized least squares correlation between ENC (not ENCp) and either generation time or body mass. All codons within an amino acid class were concatenated; because local base composition is nonsensical when combining codons across the genome, these tests were performed from ENC, not ENCp.**

| amino_acid    | median_ENC | generation time |        | body mass |        |
|---------------|------------|-----------------|--------|-----------|--------|
|               |            | t-value         | p      | t-value   | p      |
| A             | 57.935     | -0.247          | 0.806  | -1.829    | 0.0751 |
| C             | 60.911     | 0.377           | 0.708  | 0.104     | 0.918  |
| D             | 60.848     | 1.131           | 0.265  | 0.290     | 0.7732 |
| E             | 60.650     | 0.436           | 0.666  | -0.715    | 0.4789 |
| F             | 60.880     | 0.875           | 0.387  | 0.127     | 0.8994 |
| G             | 59.887     | 0.678           | 0.502  | 0.061     | 0.9515 |
| H             | 60.432     | 0.608           | 0.547  | -0.711    | 0.4811 |
| I             | 60.644     | 1.079           | 0.287  | 0.038     | 0.9697 |
| K             | 60.727     | 0.912           | 0.367  | 0.022     | 0.9824 |
| L (two-fold)  | 48.652     | 0.608           | 0.546  | -0.068    | 0.9463 |
| L (four-fold) | 51.809     | 0.515           | 0.610  | -0.554    | 0.5829 |
| N             | 60.895     | 0.894           | 0.377  | 0.089     | 0.9295 |
| P             | 59.115     | -0.684          | 0.498  | -0.057    | 0.9546 |
| Q             | 57.804     | 0.261           | 0.796  | -1.286    | 0.2059 |
| R (four-fold) | 53.689     | 0.444           | 0.659  | -0.682    | 0.4993 |
| R (two-fold)  | 49.018     | 4.810           | 0.000  | -1.351    | 0.1845 |
| S (four-fold) | 53.371     | -0.003          | 0.998  | 0.424     | 0.6742 |
| S (two-fold)  | 48.749     | 0.553           | 0.583  | -0.847    | 0.4023 |
| T             | 58.906     | 0.478           | 0.636  | -6.988    | 0      |
| V             | 56.959     | 0.709           | 0.483  | -0.468    | 0.6423 |
| Y             | 60.730     | 1.0809          | 0.2864 | 0.1853    | 0.854  |
