# Supplementary material for: Effective population size does not predict codon usage bias in mammals
Source: PubMed Central journal article supplement (PMC4242573; doi:10.1002/ece3.1249), 2014-09-23
Supplement: ece30004-3887-SD6.pdf [file ece30004-3887-SD6.pdf]

**Appendix A6.** Results of ANCOVA's across species, testing the effect X versus autosomal compartments (Chrom), the total number of coding base-pairs (Exon), the total number of base pairs in introns between coding exons (Intron), and their interactions. One transcript per gene was chosen randomly. In all species except opossum, X-linked genes had significantly lower codon usage bias compared to autosomal genes.

| Organism                       | DF    | Sum Square | Mean Squares | F       | Pr(>F)   | Significance |
|--------------------------------|-------|------------|--------------|---------|----------|--------------|
| <b>Cat:</b>                    |       |            |              |         |          |              |
| Chrom (X vs. Auto)             | 1     | 637        | 637          | 17.328  | 3.16E-05 | ***          |
| Exon (total coding bp)         | 1     | 6757       | 6757         | 183.919 | 2.00E-16 | ***          |
| Intron (total bp)              | 1     | 19234      | 19234        | 523.554 | 2.00E-16 | ***          |
| Interaction(Chrom*Exon)        | 1     | 49         | 49           | 1.323   | 0.25     |              |
| Interaction(Chrom*Intron)      | 1     | 3          | 3            | 0.083   | 0.774    |              |
| Interaction(Exon*Intron)       | 1     | 3401       | 3401         | 92.565  | 2.00E-16 | ***          |
| interaction(Chrom*Exon*Intron) | 1     | 0          | 0            | 0.001   | 0.976    |              |
| Residuals                      | 18600 | 683311     | 37           |         |          |              |
| <b>Chimp:</b>                  |       |            |              |         |          |              |
| Chrom (X vs. Auto)             | 1     | 635        | 635          | 16.908  | 3.94E-05 | ***          |
| Exon (total coding bp)         | 1     | 7921       | 7921         | 210.962 | 2.00E-16 | ***          |
| Intron (total bp)              | 1     | 14586      | 14586        | 388.475 | 2.00E-16 | ***          |
| Interaction(Chrom*Exon)        | 1     | 18         | 18           | 0.472   | 0.492    |              |
| Interaction(Chrom*Intron)      | 1     | 28         | 28           | 0.74    | 0.39     |              |
| Interaction(Exon*Intron)       | 1     | 2646       | 2646         | 70.477  | 2.00E-16 | ***          |
| interaction(Chrom*Exon*Intron) | 1     | 0          | 0            | 0       | 0.985    |              |
| Residuals                      | 17742 | 666139     | 38           |         |          |              |
| <b>Cow:</b>                    |       |            |              |         |          |              |
| Chrom (X vs. Auto)             | 1     | 789        | 789          | 18.791  | 1.47E-05 | ***          |
| Exon (total coding bp)         | 1     | 6418       | 6418         | 152.823 | 2.00E-16 | ***          |
| Intron (total bp)              | 1     | 20574      | 20574        | 489.9   | 2.00E-16 | ***          |
| Interaction(Chrom*Exon)        | 1     | 89         | 89           | 2.111   | 0.146    |              |
| Interaction(Chrom*Intron)      | 1     | 28         | 28           | 0.659   | 0.417    |              |
| Interaction(Exon*Intron)       | 1     | 2699       | 2699         | 64.264  | 1.15E-15 | ***          |
| interaction(Chrom*Exon*Intron) | 1     | 31         | 31           | 0.729   | 0.393    |              |
| Residuals                      | 19369 | 813425     | 42           |         |          |              |
| <b>Dog:</b>                    |       |            |              |         |          |              |
| Chrom (X vs. Auto)             | 1     | 237        | 237          | 5.886   | 0.0153   | *            |
| Exon (total coding bp)         | 1     | 9994       | 9994         | 247.983 | <2e-16   | ***          |
| Intron (total bp)              | 1     | 17160      | 17160        | 425.779 | <2e-16   | ***          |
| Interaction(Chrom*Exon)        | 1     | 21         | 21           | 0.528   | 0.4676   |              |
| Interaction(Chrom*Intron)      | 1     | 155        | 155          | 3.852   | 0.0497   | *            |
| Interaction(Exon*Intron)       | 1     | 3905       | 3905         | 96.879  | <2e-16   | ***          |
| interaction(Chrom*Exon*Intron) | 1     | 1          | 1            | 0.015   | 0.9038   |              |
| Residuals                      | 19202 | 773900     | 40           |         |          |              |
| <b>Gorilla:</b>                |       |            |              |         |          |              |
| Chrom (X vs. Auto)             | 1     | 148        | 148          | 3.81    | 0.051    |              |
| Exon (total coding bp)         | 1     | 6588       | 6588         | 169.153 | 2.00E-16 | ***          |
| Intron (total bp)              | 1     | 15303      | 15303        | 392.931 | 2.00E-16 | ***          |
| Interaction(Chrom*Exon)        | 1     | 39         | 39           | 0.997   | 0.318    |              |
| Interaction(Chrom*Intron)      | 1     | 14         | 14           | 0.353   | 0.553    |              |
| Interaction(Exon*Intron)       | 1     | 1697       | 1697         | 43.566  | 4.20E-11 | ***          |
| interaction(Chrom*Exon*Intron) | 1     | 6          | 6            | 0.158   | 0.691    |              |
| Residuals                      | 19436 | 756951     | 39           |         |          |              |
| <b>Horse:</b>                  |       |            |              |         |          |              |
| Chrom (X vs. Auto)             | 1     | 1962       | 1962         | 52.037  | 5.64E-13 | ***          |
| Exon (total coding bp)         | 1     | 4412       | 4412         | 117.003 | 2.00E-16 | ***          |
| Intron (total bp)              | 1     | 10293      | 10293        | 272.956 | 2.00E-16 | ***          |

|                                |       |        |       |         |          |     |
|--------------------------------|-------|--------|-------|---------|----------|-----|
| Interaction(Chrom*Exon)        | 1     | 37     | 37    | 0.973   | 0.3239   |     |
| Interaction(Chrom*Intron)      | 1     | 125    | 125   | 3.312   | 0.0688   |     |
| Interaction(Exon*Intron)       | 1     | 1201   | 1201  | 31.858  | 1.68E-08 | *** |
| interaction(Chrom*Exon*Intron) | 1     | 19     | 19    | 0.497   | 0.4809   |     |
| Residuals                      | 19697 | 742756 | 38    |         |          |     |
| Human:                         |       |        |       |         |          |     |
| Chrom (X vs. Auto)             | 1     | 434    | 434   | 10.946  | 0.00094  | *** |
| Exon (total coding bp)         | 1     | 7409   | 7409  | 186.733 | 2.00E-16 | *** |
| Intron (total bp)              | 1     | 16656  | 16656 | 419.811 | 2.00E-16 | *** |
| Interaction(Chrom*Exon)        | 1     | 0      | 0     | 0.006   | 0.93591  |     |
| Interaction(Chrom*Intron)      | 1     | 0      | 0     | 0.001   | 0.97856  |     |
| Interaction(Exon*Intron)       | 1     | 2644   | 2644  | 66.637  | 3.48E-16 | *** |
| interaction(Chrom*Exon*Intron) | 1     | 30     | 30    | 0.75    | 0.38651  |     |
| Residuals                      | 17963 | 712677 | 40    |         |          |     |
| Macaque:                       |       |        |       |         |          |     |
| Chrom (X vs. Auto)             | 1     | 296    | 296   | 7.664   | 0.00564  | **  |
| Exon (total coding bp)         | 1     | 7477   | 7477  | 193.844 | 2.00E-16 | *** |
| Intron (total bp)              | 1     | 12162  | 12162 | 315.306 | 2.00E-16 | *** |
| Interaction(Chrom*Exon)        | 1     | 4      | 4     | 0.102   | 0.74988  |     |
| Interaction(Chrom*Intron)      | 1     | 198    | 198   | 5.138   | 0.02342  | *   |
| Interaction(Exon*Intron)       | 1     | 1984   | 1984  | 51.431  | 7.68E-13 | *** |
| interaction(Chrom*Exon*Intron) | 1     | 34     | 34    | 0.88    | 0.34813  |     |
| Residuals                      | 19811 | 764125 | 39    |         |          |     |
| Marmoset:                      |       |        |       |         |          |     |
| Chrom (X vs. Auto)             | 1     | 528    | 528   | 13.07   | 0.000301 | *** |
| Exon (total coding bp)         | 1     | 8671   | 8671  | 214.712 | 2.00E-16 | *** |
| Intron (total bp)              | 1     | 15766  | 15766 | 390.395 | 2.00E-16 | *** |
| Interaction(Chrom*Exon)        | 1     | 61     | 61    | 1.512   | 0.218851 |     |
| Interaction(Chrom*Intron)      | 1     | 1      | 1     | 0.032   | 0.858999 |     |
| Interaction(Exon*Intron)       | 1     | 2108   | 2108  | 52.192  | 5.22E-13 | *** |
| interaction(Chrom*Exon*Intron) | 1     | 33     | 33    | 0.824   | 0.364117 |     |
| Residuals                      | 19665 | 794169 | 40    |         |          |     |
| Mouse:                         |       |        |       |         |          |     |
| Chrom (X vs. Auto)             | 1     | 2245   | 2245  | 79.528  | 2.00E-16 | *** |
| Exon (total coding bp)         | 1     | 7682   | 7682  | 272.13  | 2.00E-16 | *** |
| Intron (total bp)              | 1     | 3946   | 3946  | 139.792 | 2.00E-16 | *** |
| Interaction(Chrom*Exon)        | 1     | 0      | 0     | 0.001   | 0.9734   |     |
| Interaction(Chrom*Intron)      | 1     | 86     | 86    | 3.059   | 0.08032  |     |
| Interaction(Exon*Intron)       | 1     | 2458   | 2458  | 87.077  | 2.00E-16 | *** |
| interaction(Chrom*Exon*Intron) | 1     | 239    | 239   | 8.459   | 0.00364  | **  |
| Residuals                      | 19392 | 547409 | 28    |         |          |     |
| Opossum                        |       |        |       |         |          |     |
| Chrom (X vs. Auto)             | 1     | 66     | 66    | 1.947   | 0.163    |     |
| Exon (total coding bp)         | 1     | 11655  | 11655 | 344.361 | <2e-16   | *** |
| Intron (total bp)              | 1     | 9969   | 9969  | 294.548 | <2e-16   | *** |
| Interaction(Chrom*Exon)        | 1     | 6      | 6     | 0.189   | 0.664    |     |
| Interaction(Chrom*Intron)      | 1     | 15     | 15    | 0.433   | 0.51     |     |
| Interaction(Exon*Intron)       | 1     | 2405   | 2405  | 71.062  | <2e-16   | *** |
| interaction(Chrom*Exon*Intron) | 1     | 1      | 1     | 0.025   | 0.874    |     |
| Residuals                      | 20519 | 694451 | 34    |         |          |     |
| Orangutan:                     |       |        |       |         |          |     |
| Chrom (X vs. Auto)             | 1     | 507    | 507   | 13.271  | 0.00027  | *** |
| Exon (total coding bp)         | 1     | 7471   | 7471  | 195.556 | 2.00E-16 | *** |

|                                |       |        |       |         |          |     |
|--------------------------------|-------|--------|-------|---------|----------|-----|
| Intron (total bp)              | 1     | 12485  | 12485 | 326.816 | 2.00E-16 | *** |
| Interaction(Chrom*Exon)        | 1     | 1      | 1     | 0.037   | 0.84668  |     |
| Interaction(Chrom*Intron)      | 1     | 73     | 73    | 1.904   | 0.16768  |     |
| Interaction(Exon*Intron)       | 1     | 2073   | 2073  | 54.257  | 1.83E-13 | *** |
| interaction(Chrom*Exon*Intron) | 1     | 1      | 1     | 0.036   | 0.84935  |     |
| Residuals                      | 18922 | 722882 | 38    |         |          |     |
| Pig:                           |       |        |       |         |          |     |
| Chrom (X vs. Auto)             | 1     | 534    | 534   | 12.806  | 0.000346 | *** |
| Exon (total coding bp)         | 1     | 3381   | 3381  | 81.1    | 2.00E-16 | *** |
| Intron (total bp)              | 1     | 21802  | 21802 | 522.941 | 2.00E-16 | *** |
| Interaction(Chrom*Exon)        | 1     | 14     | 14    | 0.333   | 0.563815 |     |
| Interaction(Chrom*Intron)      | 1     | 15     | 15    | 0.368   | 0.54407  |     |
| Interaction(Exon*Intron)       | 1     | 1126   | 1126  | 27.001  | 2.05E-07 | *** |
| interaction(Chrom*Exon*Intron) | 1     | 7      | 7     | 0.162   | 0.687525 |     |
| Residuals                      | 20099 | 837944 | 42    |         |          |     |
| Platypus:                      |       |        |       |         |          |     |
| Chrom (X vs. Auto)             | 1     | 2746   | 2746  | 61.394  | 4.94E-15 | *** |
| Exon (total coding bp)         | 1     | 6124   | 6124  | 136.903 | 2.00E-16 | *** |
| Intron (total bp)              | 1     | 24489  | 24489 | 547.452 | 2.00E-16 | *** |
| Interaction(Chrom*Exon)        | 1     | 228    | 228   | 5.088   | 0.0241   | *   |
| Interaction(Chrom*Intron)      | 1     | 169    | 169   | 3.778   | 0.0519   | .   |
| Interaction(Exon*Intron)       | 1     | 2556   | 2556  | 57.135  | 4.27E-14 | *** |
| interaction(Chrom*Exon*Intron) | 1     | 36     | 36    | 0.802   | 0.3704   |     |
| Residuals                      | 17758 | 794356 | 45    |         |          |     |
| Rabbit:                        |       |        |       |         |          |     |
| Chrom (X vs. Auto)             | 1     | 1736   | 1736  | 45.524  | 1.55E-11 | *** |
| Exon (total coding bp)         | 1     | 8341   | 8341  | 218.722 | 2.00E-16 | *** |
| Intron (total bp)              | 1     | 16473  | 16473 | 431.96  | 2.00E-16 | *** |
| Interaction(Chrom*Exon)        | 1     | 126    | 126   | 3.305   | 0.0691   | .   |
| Interaction(Chrom*Intron)      | 1     | 51     | 51    | 1.325   | 0.2498   |     |
| Interaction(Exon*Intron)       | 1     | 3986   | 3986  | 104.516 | 2.00E-16 | *** |
| interaction(Chrom*Exon*Intron) | 1     | 24     | 24    | 0.629   | 0.4276   |     |
| Residuals                      | 18563 | 707898 | 38    |         |          |     |
| Rat:                           |       |        |       |         |          |     |
| Chrom (X vs. Auto)             | 1     | 901    | 901   | 33.155  | 8.62E-09 | *** |
| Exon (total coding bp)         | 1     | 9962   | 9962  | 366.736 | 2.00E-16 | *** |
| Intron (total bp)              | 1     | 5452   | 5452  | 200.695 | 2.00E-16 | *** |
| Interaction(Chrom*Exon)        | 1     | 139    | 139   | 5.122   | 0.0236   | *   |
| Interaction(Chrom*Intron)      | 1     | 0      | 0     | 0.016   | 0.8984   |     |
| Interaction(Exon*Intron)       | 1     | 2517   | 2517  | 92.652  | 2.00E-16 | *** |
| interaction(Chrom*Exon*Intron) | 1     | 0      | 0     | 0.002   | 0.9642   |     |
| Residuals                      | 21959 | 596481 | 27    |         |          |     |
| Sheep:                         |       |        |       |         |          |     |
| Chrom (X vs. Auto)             | 1     | 417    | 417   | 10.841  | 0.000994 | *** |
| Exon (total coding bp)         | 1     | 4473   | 4473  | 116.269 | 2.00E-16 | *** |
| Intron (total bp)              | 1     | 13554  | 13554 | 352.351 | 2.00E-16 | *** |
| Interaction(Chrom*Exon)        | 1     | 204    | 204   | 5.294   | 0.021407 | *   |
| Interaction(Chrom*Intron)      | 1     | 2      | 2     | 0.042   | 0.837312 |     |
| Interaction(Exon*Intron)       | 1     | 1495   | 1495  | 38.861  | 4.64E-10 | *** |
| interaction(Chrom*Exon*Intron) | 1     | 1      | 1     | 0.022   | 0.883071 |     |
| Residuals                      | 19656 | 756112 | 38    |         |          |     |
