# Supplementary material for: Effective population size does not predict codon usage bias in mammals
Source: PubMed Central journal article supplement (PMC4242573; doi:10.1002/ece3.1249), 2014-09-23
Supplement: ece30004-3887-SD7.pdf [file ece30004-3887-SD7.pdf]

**Appendix S7.** Results of ANCOVA's across species, testing the effect centromeric vs. telomeric location (location), the total number of coding base-pairs (Exon), the total number of base pairs in introns between coding exons (Intron), and their interactions. One transcript per gene was chosen randomly. In all species except opossum, X-linked genes had significantly lower codon usage bias compared to autosomal genes.

| Organism                          | DF   | Sum Square | Mean Squares | F      | Pr(>F)   | Significance |
|-----------------------------------|------|------------|--------------|--------|----------|--------------|
| <b>Chimp:</b>                     |      |            |              |        |          |              |
| Location (Centro vs. Telo)        | 1    | 694        | 693.8        | 21.255 | 4.28E-06 | ***          |
| Exon (total coding bp)            | 1    | 152        | 152.1        | 4.66   | 0.031    | *            |
| Intron (total bp)                 | 1    | 1118       | 1117.7       | 34.239 | 5.70E-09 | ***          |
| Interaction(Location*Exon)        | 1    | 48         | 47.6         | 1.457  | 0.228    |              |
| Interaction(Location*Intron)      | 1    | 15         | 14.7         | 0.451  | 0.502    |              |
| Interaction(Exon*Intron)          | 1    | 24         | 24.2         | 0.74   | 0.39     |              |
| interaction(Location*Exon*Intron) | 1    | 13         | 12.6         | 0.385  | 0.535    |              |
| Residuals                         | 1970 | 64309      | 32.6         |        |          |              |
| <b>Human:</b>                     |      |            |              |        |          |              |
| Location (Centro vs. Telo)        | 1    | 1101       | 1100.9       | 32.261 | 1.55E-08 | ***          |
| Exon (total coding bp)            | 1    | 386        | 386.1        | 11.313 | 0.000785 | ***          |
| Intron (total bp)                 | 1    | 1656       | 1656.2       | 48.532 | 4.42E-12 | ***          |
| Interaction(Location*Exon)        | 1    | 2          | 2.1          | 0.063  | 0.802459 |              |
| Interaction(Location*Intron)      | 1    | 66         | 65.5         | 1.92   | 0.165991 |              |
| Interaction(Exon*Intron)          | 1    | 99         | 99.2         | 2.907  | 0.088375 |              |
| interaction(Location*Exon*Intron) | 1    | 4          | 4.3          | 0.126  | 0.722877 |              |
| Residuals                         | 1957 | 66784      | 34.1         |        |          |              |
| <b>Marmoset:</b>                  |      |            |              |        |          |              |
| Location (Centro vs. Telo)        | 1    | 49         | 49.3         | 1.287  | 0.256797 |              |
| Exon (total coding bp)            | 1    | 527        | 526.6        | 13.743 | 0.000215 | ***          |
| Intron (total bp)                 | 1    | 1478       | 1478.5       | 38.581 | 6.21E-10 | ***          |
| Interaction(Location*Exon)        | 1    | 41         | 41.2         | 1.074  | 0.300065 |              |
| Interaction(Location*Intron)      | 1    | 6          | 5.9          | 0.155  | 0.694206 |              |
| Interaction(Exon*Intron)          | 1    | 34         | 34           | 0.888  | 0.346175 |              |
| interaction(Location*Exon*Intron) | 1    | 8          | 8.2          | 0.214  | 0.643803 |              |
| Residuals                         | 2320 | 88905      | 38.3         |        |          |              |
| <b>Mouse:</b>                     |      |            |              |        |          |              |
| Location (Centro vs. Telo)        | 1    | 550        | 550.3        | 22.142 | 2.73E-06 | ***          |
| Exon (total coding bp)            | 1    | 419        | 418.8        | 16.851 | 4.23E-05 | ***          |
| Intron (total bp)                 | 1    | 387        | 387.1        | 15.573 | 8.24E-05 | ***          |
| Interaction(Location*Exon)        | 1    | 4          | 3.5          | 0.143  | 0.70578  |              |
| Interaction(Location*Intron)      | 1    | 35         | 35.4         | 1.424  | 0.23287  |              |
| Interaction(Exon*Intron)          | 1    | 169        | 168.7        | 6.789  | 0.00925  | **           |
| interaction(Location*Exon*Intron) | 1    | 7          | 6.6          | 0.264  | 0.60713  |              |
| Residuals                         | 1788 | 44439      | 24.9         |        |          |              |
| <b>Orangutan:</b>                 |      |            |              |        |          |              |
| Location (Centro vs. Telo)        | 1    | 785        | 785.3        | 22.431 | 2.31E-06 | ***          |
| Exon (total coding bp)            | 1    | 218        | 217.8        | 6.222  | 0.0127   | *            |
| Intron (total bp)                 | 1    | 1025       | 1024.8       | 29.271 | 6.93E-08 | ***          |
| Interaction(Location*Exon)        | 1    | 65         | 64.5         | 1.843  | 0.1747   |              |
| Interaction(Location*Intron)      | 1    | 144        | 143.8        | 4.108  | 0.0428   | *            |
| Interaction(Exon*Intron)          | 1    | 66         | 65.7         | 1.875  | 0.171    |              |
| interaction(Location*Exon*Intron) | 1    | 0          | 0            | 0      | 0.9864   |              |
| Residuals                         | 2341 | 81956      | 35           |        |          |              |
