# Supplementary material for: Effective population size does not predict codon usage bias in mammals
Source: PubMed Central journal article supplement (PMC4242573; doi:10.1002/ece3.1249), 2014-09-23
Supplement: ece30004-3887-SD9.pdf [file ece30004-3887-SD9.pdf]

**Appendix S9. Point estimates and bootstrap ranges for Ne and ENCp**

---

| Species              | Ne      | Ne 95% bootstrap  | ENCp  | ENCp 95% bootstrap |
|----------------------|---------|-------------------|-------|--------------------|
| Human                | 10,000  | 7,363-16,057      | 51.42 | 51.26-51.57        |
| Chimp                | 25,000  | 18,545-40,046     | 51.23 | 51.05-51.39        |
| <i>M. musculus</i>   | 60,000  | 45,575-95,542     | 51.27 | 51.14-51.39        |
| <i>M. domesticus</i> | 100,000 | 75,624-137,677    | 51.25 | 51.13-51.38        |
| <i>M. castaneus</i>  | 220,000 | 156,067-271,423   | 51.23 | 51.12-51.35        |
| Rabbit               | 780,000 | 572,651-1,060,260 | 50.39 | 50.23-50.58        |

---
