# Supplementary material for: Effective population size does not predict codon usage bias in mammals
Source: PubMed Central journal article supplement (PMC4242573; doi:10.1002/ece3.1249), 2014-09-23
Supplement: ece30004-3887-SD10.pdf [file ece30004-3887-SD10.pdf]

**Appendix S10. The results of a phylogenetic generalized least squares correlation between ENC (not ENCp) and genetic estimates of Ne from six mammalian species. All codons within an amino acid class were concatenated; because local base composition is nonsensical when combining codons across the genome, these tests were performed from ENC, not ENCp.**

| amino_acid    | median_ENC | t-value     | uncorrected p |
|---------------|------------|-------------|---------------|
| A             | 57.9798    | -4.98       | 0.0076        |
| C             | 60.8893    | -7.98       | 0.0013        |
| D             | 60.8124    | -9.38       | 0.0007        |
| E             | 60.5010    | -4.03       | 0.0157        |
| F             | 60.7711    | -4.49       | 0.0109        |
| G             | 60.0071    | -8.39       | 0.0011        |
| H             | 60.3722    | -10.63      | 4e-04         |
| I             | 60.5498    | -3.08       | 0.0369        |
| K             | 60.2881    | -7.18       | 0.002         |
| L (four-fold) | 51.8440    | -9.29       | 7e-04         |
| L (two-fold)  | 48.4875    | -0.56       | 0.6073        |
| N             | 60.6574    | -1.69       | 0.1659        |
| P             | 58.9117    | <b>9.47</b> | 7e-04         |
| Q             | 57.4658    | -4.52       | 0.0106        |
| R (four-fold) | 53.8870    | -4.53       | 0.0106        |
| R (two-fold)  | 48.9991    | -8.83       | 9e-04         |
| S (four-fold) | 53.3000    | 0.70        | 0.5209        |
| S (two-fold)  | 48.7191    | -26.76      | 0             |
| T             | 58.8219    | <b>8.73</b> | 9e-04         |
| V             | 56.7733    | -21.59      | 0             |
| Y             | 60.5647    | -7.70       | 0.0015        |
