# Supplementary material for: Effective population size does not predict codon usage bias in mammals
Source: Ecol Evol. 2014 Sep 23;4(20):3887–900. doi: 10.1002/ece3.1249 (PMC4242573; doi:10.1002/ece3.1249)
Supplement: Supplementary file 3 — Appendix S3. The 41 mammalian genomes analyzed. Average age of sexual maturity and average body mass taken from http://animaldiversity.ummz.umich.edu, last accessed Jan. 2014. 95% confidence intervals of median codon bias estimated by bootstrapping. [file ece30004-3887-SD3.pdf]

**Appendix S3. The 41 mammalian genomes analyzed. Average age of sexual maturity and average body mass taken from <http://animaldiversity.ummz.umich.edu>. 95% confidence intervals of medians estimated by bootstrapping.**

| CommonName  | Species                    | Average age at sexual maturity (years) | Average body mass (kg) | ENCp (95% CI)       | N     | ENCp (95% CI), chrX | N   | ENCp (95% CI), autosomes | N     | ENCp (95% CI), telomere | N    | ENCp (95% CI), centromere | N    |
|-------------|----------------------------|----------------------------------------|------------------------|---------------------|-------|---------------------|-----|--------------------------|-------|-------------------------|------|---------------------------|------|
| Alpaca      | Vicugna pacos              | 1.94                                   | 60.00                  | 51.41 (51.19-51.57) | 10235 |                     |     |                          |       |                         |      |                           |      |
| Armadillo   | Dasypus novemcinctus       | 1.50                                   | 5.65                   | 49.48 (49.35-49.60) | 21565 |                     |     |                          |       |                         |      |                           |      |
| BushBaby    | Otolemur garnettii         | 1.33                                   | 0.7715                 | 50.17 (50.06-50.29) | 18954 |                     |     |                          |       |                         |      |                           |      |
| Cat         | Felis catus                | 0.63                                   | 4.75                   | 50.20 (50.08-50.33) | 18630 | 51.47 (50.85-51.90) | 752 | 50.14 (50.00-50.29)      | 17878 |                         |      |                           |      |
| Chimp       | Pan troglodytes            | 12.50                                  | 48.00                  | 50.33 (50.18-50.46) | 17831 | 51.69 (51.09-52.12) | 617 | 50.27 (50.14-50.42)      | 17214 | 48.30 (47.96-48.59)     | 1938 | 50.38 (50.05-50.76)       | 1978 |
| Cow         | Bos taurus                 | 1.00                                   | 755.00                 | 48.93 (48.81-49.06) | 19402 | 50.21 (49.71-50.62) | 810 | 48.87 (48.72-49.00)      | 18592 |                         |      |                           |      |
| Devil       | Sarcophilus harrisii       | 2.00                                   | 27.50                  | 51.16 (51.04-51.27) | 18008 |                     |     |                          |       |                         |      |                           |      |
| Dog         | Canis familiaris           | 0.75                                   | 40.00                  | 49.97 (49.85-50.08) | 19227 | 50.54 (50.09-51.12) | 802 | 49.94 (49.82-50.05)      | 18425 |                         |      |                           |      |
| Dolphin     | Tursiops truncatus         | 10.25                                  | 230.00                 | 50.11 (49.98-50.24) | 15874 |                     |     |                          |       |                         |      |                           |      |
| Elephant    | Loxodonta africana         | 11.00                                  | 4800.00                | 49.87 (49.75-49.99) | 19410 |                     |     |                          |       |                         |      |                           |      |
| Ferret      | Mustela putorius furo      | 0.50                                   | 1.50                   | 49.96 (49.84-50.08) | 19049 |                     |     |                          |       |                         |      |                           |      |
| Gibbon      | Nomascus leucogenys        | 0.54                                   | 5.70                   | 50.66 (50.52-50.76) | 17806 |                     |     |                          |       |                         |      |                           |      |
| Gorilla     | Gorilla gorilla            | 12.50                                  | 180.00                 | 50.20 (50.09-50.33) | 19476 | 50.88 (50.27-51.28) | 817 | 50.18 (50.05-50.30)      | 18659 |                         |      |                           |      |
| GuineaPig   | Cavia porcellus            | 0.25                                   | 0.9000                 | 49.27 (49.17-49.40) | 17948 |                     |     |                          |       |                         |      |                           |      |
| Hedgehog    | Erinaceus europaeus        | 0.69                                   | 1.00                   | 51.99 (51.89-52.11) | 13759 |                     |     |                          |       |                         |      |                           |      |
| Horse       | Equus caballus             | 2.58                                   | 1150.00                | 50.26 (50.13-50.37) | 19727 | 51.95 (51.43-52.52) | 831 | 50.15 (50.02-50.29)      | 18896 |                         |      |                           |      |
| Human       | Homo sapiens               | 18.00                                  | 60.70                  | 50.12 (49.99-50.26) | 18027 | 50.92 (50.34-51.54) | 758 | 50.08 (49.96-50.22)      | 17269 | 48.05 (47.71-48.46)     | 1903 | 49.57 (49.23-49.98)       | 2091 |
| Hyrax       | Procavia capensis          | 1.33                                   | 3.80                   | 50.49 (50.37-50.61) | 14986 |                     |     |                          |       |                         |      |                           |      |
| KangarooRat | Dipodomys ordii            | 0.17                                   | 0.0755                 | 50.31 (50.19-50.44) | 14629 |                     |     |                          |       |                         |      |                           |      |
| Macaque     | Macaca mulatta             | 4.50                                   | 8.00                   | 50.38 (50.26-50.48) | 19868 | 51.20 (50.74-51.65) | 861 | 50.33 (50.22-50.45)      | 19007 |                         |      |                           |      |
| Marmoset    | Callithrix jacchus         | 1.37                                   | 330.00                 | 50.23 (50.11-50.35) | 19723 | 51.24 (50.60-51.72) | 784 | 50.18 (50.07-50.31)      | 18939 | 48.93 (48.50-49.36)     | 1922 | 49.42 (49.10-49.70)       | 2430 |
| Megabat     | Pteropus vampyrus          | 2.00                                   | 0.8500                 | 50.12 (49.97-50.25) | 16234 |                     |     |                          |       |                         |      |                           |      |
| Microbat    | Myotis lucifugus           | 0.58                                   | 0.0095                 | 49.03 (48.90-49.17) | 18908 |                     |     |                          |       |                         |      |                           |      |
| Mouse       | Mus musculus               | 0.17                                   | 0.0210                 | 50.41 (50.32-50.52) | 19424 | 52.34 (51.93-52.74) | 820 | 50.33 (50.23-50.41)      | 18604 | 49.56 (49.22-49.96)     | 1800 | 51.43 (51.01-51.64)       | 1346 |
| MouseLemur  | Microcebus murinus         | 0.67                                   | 0.0600                 | 49.67 (49.50-49.82) | 14771 |                     |     |                          |       |                         |      |                           |      |
| Opossum     | Monodelphis domestica      | 0.50                                   | 0.1225                 | 51.51 (51.40-51.62) | 20541 | 51.87 (51.22-52.28) | 480 | 51.50 (51.39-51.61)      | 20061 |                         |      |                           |      |
| Orangutan   | Pongo abelii               | 15.88                                  | 60.00                  | 50.26 (50.13-50.38) | 18959 | 51.33 (50.57-51.79) | 760 | 50.21 (50.06-50.34)      | 18199 | 48.22 (47.89-48.61)     | 2047 | 49.73 (49.40-50.09)       | 2407 |
| Panda       | Ailuropoda melanoleuca     | 5.75                                   | 102.50                 | 49.89 (49.78-50.02) | 18426 |                     |     |                          |       |                         |      |                           |      |
| Pig         | Sus scrofa                 | 0.75                                   | 200.00                 | 49.27 (49.14-49.41) | 20155 | 50.21 (49.73-50.74) | 658 | 49.24 (49.09-49.37)      | 19497 |                         |      |                           |      |
| Pika        | Ochotona princeps          | 0.98                                   | 0.1485                 | 49.96 (49.84-50.09) | 14559 |                     |     |                          |       |                         |      |                           |      |
| Platypus    | Ornithorhynchus anatinus   | 1.75                                   | 1.65                   | 50.03 (49.87-50.16) | 17810 | 53.21 (52.36-53.74) | 427 | 49.93 (49.79-50.07)      | 17383 |                         |      |                           |      |
| Rabbit      | Oryctolagus cuniculus      | 0.67                                   | 2.00                   | 49.77 (49.64-49.89) | 18601 | 51.60 (51.08-52.08) | 622 | 49.69 (49.57-49.82)      | 17979 |                         |      |                           |      |
| Rat         | Rattus norvegicus          | 0.29                                   | 0.32                   | 50.50 (50.40-50.57) | 21994 | 52.02 (51.60-52.41) | 834 | 50.43 (50.34-50.52)      | 21160 |                         |      |                           |      |
| Sheep       | Ovis aries                 | 2.00                                   | 110.00                 | 49.53 (49.40-49.65) | 19688 | 50.11 (49.74-50.68) | 843 | 49.50 (49.37-49.64)      | 18845 |                         |      |                           |      |
| Shrew       | Sorex araneus              | 0.79                                   | 0.0095                 | 50.60 (50.43-50.76) | 11073 |                     |     |                          |       |                         |      |                           |      |
| Sloth       | Choloepus hoffmanni        | 3.75                                   | 6.00                   | 51.81 (51.64-51.96) | 10565 |                     |     |                          |       |                         |      |                           |      |
| Squirrel    | Ictidomys tridecemlineatus | 0.92                                   | 0.1250                 | 49.52 (49.39-49.63) | 18274 |                     |     |                          |       |                         |      |                           |      |
| Tarsier     | Tarsius syrichta           | 1.42                                   | 0.1250                 | 51.83 (51.69-51.95) | 11813 |                     |     |                          |       |                         |      |                           |      |
| Tenrec      | Echinops telfairi          | 0.07                                   | 0.2025                 | 50.23 (50.11-50.40) | 14625 |                     |     |                          |       |                         |      |                           |      |
| Treeshrew   | Tupaia belangeri           | 0.38                                   | 0.1450                 | 50.69 (50.51-50.86) | 13746 |                     |     |                          |       |                         |      |                           |      |
| Wallaby     | Macropus eugenii           | 1.38                                   | 6.55                   | 51.70 (51.60-51.81) | 13819 |                     |     |                          |       |                         |      |                           |      |
